# Supplementary material
Source: PubMed Central journal article supplement (PMC3896030)
Supplement: supp_bhn256_cercor-2008-00747-File017_bhn256.pdf [file supp_bhn256_cercor-2008-00747-File017_bhn256.pdf]

## Supplementary Tables

Table S1

| <b>SET A</b>     |          |          |          |
|------------------|----------|----------|----------|
| <b>REGION</b>    | <b>X</b> | <b>Y</b> | <b>Z</b> |
| R IPS            | 30       | -65      | 39       |
| L IPS            | -31      | -63      | 42       |
| R Frontal Cortex | 41       | 1        | 39       |
| L Frontal Cortex | -41      | 1        | 39       |
| R Precuneus      | 10       | -73      | 39       |
| L Precuneus      | -9       | -76      | 36       |
| MidCingulate     | 0        | -31      | 31       |
| R IPL            | 52       | -51      | 43       |
| L IPL            | -52      | -54      | 36       |
| R dIPFC          | 43       | 21       | 38       |
| L dIPFC          | -43      | 21       | 38       |
| R al/fo          | 36       | 16       | 5        |
| L al/fo          | -35      | 14       | 6        |
| dACC msFC        | -1       | 8        | 50       |
| R aPFC           | 27       | 50       | 28       |
| L aPFC           | -28      | 52       | 19       |
| R ant thalamus   | 10       | -16      | 8        |
| L ant thalamus   | -12      | -16      | 8        |
| R lat cerebellum | 31       | -61      | -38      |
| L lat cerebellum | -32      | -66      | -38      |
| R inf cerebellum | 18       | -81      | -44      |
| L inf cerebellum | -19      | -79      | -44      |
| R TPJ            | 54       | -48      | 16       |
| L TPJ            | -54      | -48      | 16       |
| R midoccipital   | 27       | -92      | -2       |
| L midoccipital   | -27      | -92      | -2       |
| R Lingual        | 8        | -85      | 0        |
| L Lingual        | -8       | -85      | 0        |
| R posttemporal   | 44       | -78      | 24       |
| L posttemporal   | -40      | -82      | 22       |
| R postcingulate  | 10       | -58      | 14       |
| L postcingulate  | -11      | -59      | 11       |
| R fusiform       | 35       | -66      | -15      |
| L fusiform       | -34      | -63      | -22      |
| R ant fusiform   | 25       | -45      | -17      |
| L ant fusiform   | -25      | -45      | -17      |
| R midtemporal    | 52       | -34      | -4       |
| L midtemporal    | -54      | -32      | -8       |
| vmPFC            | 1        | 32       | -1       |

**Table S1. Continued**

| <b>SET B</b>  |          |          |          |
|---------------|----------|----------|----------|
| <b>REGION</b> | <b>X</b> | <b>Y</b> | <b>Z</b> |
| IPS-L         | -26      | -58      | 48       |
| IPS-R         | 26       | -58      | 48       |
| vIPS-L        | -26      | -82      | 20       |
| vIPS-R        | 30       | -82      | 16       |
| FEF-L         | -30      | -10      | 48       |
| FEF-R         | 26       | -6       | 52       |
| IPCS-L        | -46      | -2       | 40       |
| SMA/preSMA    | -2       | 10       | 48       |
| DLPFC-R       | 38       | 26       | 32       |
| vOC-L         | -46      | -66      | -4       |
| vOC-R         | 34       | -74      | -4       |
| ains-L        | -30      | 22       | 0        |
| ains-R        | 30       | 22       | 8        |
| ains-R2       | 30       | 18       | -4       |
| vFEF-R        | 46       | 2        | 24       |
| vOC-L2        | -18      | -90      | -16      |
| Th-L          | -18      | -14      | 8        |
| pCC1          | -6       | -58      | 28       |
| pCC2          | 6        | -46      | 8        |
| LPC-L         | -46      | -66      | 24       |
| aCC1          | -2       | 46       | -4       |
| aCC2          | 6        | 50       | 28       |
| SFC-L         | -18      | 34       | 48       |
| SFC-R         | 14       | 38       | 48       |
| iTC-R         | 50       | -14      | -20      |
| paraHipp-L    | -22      | -22      | -20      |
| paraHipp-R    | 18       | -22      | -20      |
| NA            | 2        | 14       | -12      |

**Table S1. Continued**

| <b>SET C</b>                                   |              |                                              |              |
|------------------------------------------------|--------------|----------------------------------------------|--------------|
| REGION                                         | ABBREVIATION | REGION                                       | ABBREVIATION |
| Frontal Pole                                   | FP           | Cingulate Gyrus, anterior division           | CGa          |
| Insular Cortex                                 | INS          | Cingulate Gyrus, posterior division          | CGp          |
| Superior Frontal Gyrus                         | SFG          | Precuneus Cortex                             | PCN          |
| Middle Frontal Gyrus                           | MFG          | Cuneal Cortex                                | CN           |
| Inferior Frontal Gyrus, pars triangularis      | IFGt         | Frontal Orbital Cortex                       | FOC          |
| Inferior Frontal Gyrus, pars opercularis       | IFGo         | Parahippocampal Gyrus, anterior division     | PHa          |
| Precentral Gyrus                               | PRG          | Parahippocampal Gyrus, posterior division    | PHp          |
| Temporal Pole                                  | TP           | Lingual Gyrus                                | LG           |
| Superior Temporal Gyrus, anterior division     | STGa         | Temporal Fusiform Cortex, anterior division  | TFa          |
| Superior Temporal Gyrus, posterior division    | STGp         | Temporal Fusiform Cortex, posterior division | TFp          |
| Middle Temporal Gyrus, anterior division       | MTGa         | Temporal Occipital Fusiform Cortex           | TOF          |
| Middle Temporal Gyrus, posterior division      | MTGp         | Occipital Fusiform Gyrus                     | OF           |
| Middle Temporal Gyrus, temporooccipital part   | MTGto        | Frontal Operculum Cortex                     | FO           |
| Inferior Temporal Gyrus, anterior division     | ITGa         | Central Opercular Cortex                     | CO           |
| Inferior Temporal Gyrus, posterior division    | ITGp         | Parietal Operculum Cortex                    | PO           |
| Inferior Temporal Gyrus, temporooccipital part | ITGto        | Planum Polare                                | PP           |
| Postcentral Gyrus                              | POG          | Heschl's Gyrus                               | HG           |
| Superior Parietal Lobule                       | SPL          | Planum Temporale                             | PT           |
| Supramarginal Gyrus, anterior division         | SGa          | Supracalcarine Cortex                        | SCLC         |
| Supramarginal Gyrus, posterior division        | SGp          | Occipital Pole                               | OP           |
| Angular Gyrus                                  | AG           | Thalamus                                     | Th           |
| Lateral Occipital Cortex, superior division    | OLs          | Caudate                                      | Cd           |
| Lateral Occipital Cortex, inferior division    | OLi          | Putamen                                      | Pu           |
| Intracalcarine Cortex                          | CALC         | Pallidum                                     | GP           |
| Frontal Medial Cortex                          | FMC          | Brainstem                                    | BS           |
| Supplementary Motor Cortex                     | SMC          | Hippocampus                                  | Hi           |
| Subcallosal Cortex                             | SC           | Amygdala                                     | Amg          |
| Paracingulate Gyrus                            | PAC          | Accumbens                                    | Acb          |

Listed are the regions and coordinates for seed sets A and B and only the regions for seed set C. Seed sets A and C are in MNI152 space while seed set B is in MNI305 space.

**Table S2****SIGNIFICANT POSITIVE CORRELATIONS**

| <b>REGION</b> | <b>SCAN 1</b> | <b>SCAN 2</b> | <b>SCAN 3</b> | <b>MEAN</b> |
|---------------|---------------|---------------|---------------|-------------|
| aCC1          | 10            | 7             | 9             | 9           |
| pCC1          | 9             | 8             | 8             | 8           |
| IPS-R         | 7             | 5             | 5             | 6           |
| vIPS-L        | 6             | 5             | 6             | 6           |
| aCC2          | 6             | 6             | 5             | 6           |
| SMA/preSMA    | 5             | 7             | 3             | 5           |
| LPC-L         | 5             | 5             | 5             | 5           |
| SFC-L         | 5             | 5             | 5             | 5           |
| SFC-R         | 5             | 6             | 5             | 5           |
| IPS-L         | 5             | 4             | 4             | 4           |
| vIPS-R        | 6             | 3             | 3             | 4           |
| FEF-L         | 4             | 5             | 3             | 4           |
| FEF-R         | 2             | 6             | 3             | 4           |
| vOC-L         | 5             | 4             | 2             | 4           |
| alns-L        | 4             | 5             | 3             | 4           |
| alns-R2       | 5             | 3             | 3             | 4           |
| paraHipp-L    | 4             | 3             | 4             | 4           |
| NuAc          | 4             | 6             | 2             | 4           |
| IPCS-L        | 4             | 3             | 1             | 3           |
| vOC-R         | 3             | 3             | 3             | 3           |
| pCC2          | 2             | 4             | 3             | 3           |
| alns-R        | 2             | 2             | 2             | 2           |
| vFEF-R        | 5             | 1             | 1             | 2           |
| vOC-L2        | 2             | 1             | 2             | 2           |
| paraHipp-R    | 3             | 1             | 2             | 2           |
| ITC-R         | 3             | 1             | 0             | 1           |
| DLPFC-R       | 1             | 0             | 0             | 0           |
| Th-L          | 0             | 1             | 0             | 0           |

Listed are the number of statistically significant correlations exhibited by each region in seed Set B (Toro *et al.* 2008), for each scan and across all three scans.

Table S3

**TASK POSITIVE NETWORK**

| REGION      | SCANS 2/4  | SCANS 2/5  | SCANS 3/4  | SCANS 3/5  | SCANS 2+3/4+5 |
|-------------|------------|------------|------------|------------|---------------|
| IPS-L       | 86%        | 86%        | 82%        | 82%        | 82%           |
| IPS-R       | 95%        | 86%        | 86%        | 77%        | 86%           |
| vIPS-L      | 77%        | 68%        | 82%        | 73%        | 77%           |
| vIPS-R      | 77%        | 68%        | 82%        | 73%        | 77%           |
| FEF-L       | 86%        | 91%        | 77%        | 82%        | 86%           |
| FEF-R       | 91%        | 100%       | 91%        | 100%       | 86%           |
| IPCS-L      | 59%        | 77%        | 64%        | 82%        | 68%           |
| SMA/preSMA  | 68%        | 82%        | 59%        | 73%        | 86%           |
| DLPFC-R     | 64%        | 59%        | 59%        | 55%        | 59%           |
| vOC-L       | 86%        | 82%        | 77%        | 73%        | 86%           |
| vOC-R       | 59%        | 68%        | 64%        | 73%        | 59%           |
| alns-L      | 77%        | 77%        | 68%        | 68%        | 68%           |
| alns-R      | 64%        | 59%        | 59%        | 55%        | 68%           |
| alns-R2     | 59%        | 64%        | 55%        | 59%        | 68%           |
| vFEF-R      | 82%        | 91%        | 68%        | 77%        | 82%           |
| vOC-L2      | 59%        | 59%        | 68%        | 68%        | 55%           |
| Th-L        | 59%        | 59%        | 55%        | 55%        | 64%           |
| <b>Mean</b> | <b>74%</b> | <b>75%</b> | <b>70%</b> | <b>72%</b> | <b>74%</b>    |

**DEFAULT MODE NETWORK**

| REGION      | SCANS 2/4  | SCANS 2/5  | SCANS 3/4  | SCANS 3/5  | SCANS 2+3/4+5 |
|-------------|------------|------------|------------|------------|---------------|
| pCC1        | 100%       | 91%        | 100%       | 91%        | 100%          |
| pCC2        | 82%        | 86%        | 82%        | 86%        | 91%           |
| LPC-L       | 95%        | 86%        | 95%        | 86%        | 100%          |
| aCC1        | 95%        | 91%        | 95%        | 91%        | 95%           |
| aCC2        | 91%        | 86%        | 91%        | 86%        | 91%           |
| SFC-L       | 82%        | 86%        | 73%        | 77%        | 95%           |
| SFC-R       | 86%        | 91%        | 77%        | 82%        | 95%           |
| ITC-R       | 64%        | 68%        | 73%        | 77%        | 73%           |
| paraHipp-L  | 91%        | 86%        | 86%        | 82%        | 100%          |
| paraHipp-R  | 86%        | 86%        | 86%        | 86%        | 100%          |
| NuAc        | 91%        | 86%        | 82%        | 77%        | 86%           |
| <b>Mean</b> | <b>88%</b> | <b>86%</b> | <b>86%</b> | <b>84%</b> | <b>93%</b>    |

Listed is the percent agreement for each region in seed Set B (Toro *et al.* 2008) (i.e., the proportion of participants for whom that region was assigned to the same cluster as in Toro *et al.* (2008)). Data are shown for agreement between scans 2 and 4 (2/4), 2 and 5 (2/5), 3 and 4 (3/4), and 3 and 5 (3/5), and agreement between an average of scans 2 and 3 (2+3) and an average of scans 4 and 5 (4+5).
